# Supplementary material for: Artificial Intelligence Implementation in Healthcare: A Theory-Based Scoping Review of Barriers and Facilitators
Source: MDPI journal article supplement (doi:10.3390/ijerph192316359), 2022-12-06
Supplement: s1 [file s1]

| CFIR domain                        | CFIR construct                               | Concept                                   | Theme                       |
|------------------------------------|----------------------------------------------|-------------------------------------------|-----------------------------|
| I. INTERVENTION CHARACTERISTICS    | B. Evidence and strength and quality         | Evaluation and testing                    | Evaluation and testing      |
|                                    |                                              | Prior Evidence                            | Background                  |
|                                    | C. Relative advantage                        | Innovation                                | Technical design            |
|                                    | D. Adaptability                              | Model Interoperability                    | Interoperability            |
|                                    |                                              | Generalizability                          | Interoperability            |
|                                    |                                              | Adaptability                              | Technical design            |
|                                    | E. Trialability                              | Trialability                              | Technical design            |
|                                    | F. Complexity                                | Disruptiveness (alert fatigue)            | Clinical workflow           |
|                                    |                                              | Complexity                                | Technical design            |
|                                    | G. Design quality and packaging              | Data quality                              | Data quality and management |
|                                    |                                              | Generalizability                          | Interoperability            |
|                                    |                                              | Usability                                 | Technical design            |
|                                    |                                              | Documentation and presentation of results | Technical design            |
|                                    | H. Cost                                      | Cost                                      | Finance and resources       |
| II. OUTER SETTING                  | A. Patient Needs and Resources               | Patient needs                             | Management and engagement   |
|                                    | B. Cosmopolitanism                           | External collaboration                    | Management and engagement   |
|                                    | D. External Policies and Incentives          | Regulation and law                        | AI policy and regulatory    |
| III. INNER SETTING                 | B. Networks and communication                | Communication                             | Management and engagement   |
|                                    | C. Culture                                   | Organizational policy and culture         | AI policy and regulatory    |
|                                    | D. 1. Tension for change                     | Healthcare demand                         | Background                  |
|                                    | D. 2. Compatibility                          | Data quality                              | Data quality and management |
|                                    |                                              | Integration                               | Clinical workflow           |
|                                    |                                              | Disruptiveness (alert fatigue)            | Clinical workflow           |
|                                    |                                              | Data interoperability                     | Interoperability            |
|                                    | D. 4. Organizational Incentives and Rewards  | Organizational policy and culture         | AI policy and regulatory    |
|                                    | E. 1. Leadership engagement                  | Leadership                                | Management and engagement   |
|                                    | E. 2. Available resources                    | Data availability                         | Data quality and management |
|                                    |                                              | Available resources                       | Finance and resources       |
|                                    | E. 3. Access to knowledge and information    | Experiences and prior knowledge           | Background                  |
|                                    |                                              | Education of workforce                    | Management and engagement   |
|                                    |                                              | Interpretability                          | Trust and transparency      |
|                                    |                                              | Documentation and presentation of results | Technical design            |
| IV. CHARACTERISTICS OF INDIVIDUALS | A. Knowledge and belief about the innovation | Experiences and prior knowledge           | Background                  |
|                                    |                                              | Interpretability                          | Trust and transparency      |
|                                    |                                              | Trust                                     | Trust and transparency      |
|                                    | E. Other personal attributes                 | Motivation                                | Management and engagement   |
| V. PROCESS                         | A. Planning                                  | Planning                                  | Management and engagement   |
|                                    | B. 3. Champions                              | Champions                                 | Management and engagement   |
|                                    | B. 5. Key stakeholders                       | Involvement                               | Management and engagement   |
|                                    |                                              | Motivation                                | Management and engagement   |
|                                    | D. Reflecting and evaluating                 | Evaluation and testing                    | Evaluation and testing      |
|                                    |                                              | Feedback incorporation                    | Management and engagement   |
|                                    |                                              | Model Interoperability                    | Interoperability            |
