# Supplementary material for: Artificial Intelligence Implementation in Healthcare: A Theory-Based Scoping Review of Barriers and Facilitators
Source: Int J Environ Res Public Health. 2022 Dec 6;19(23):16359. doi: 10.3390/ijerph192316359 (PMC9738234; doi:10.3390/ijerph192316359)
Supplement: Supplementary file 1 [file ijerph-19-16359-s001.zip]

Archive with 5 entries (5 files):
- Additional file S1.txt
- Additional file S2.xlsx
- Additional file S3.pdf
- Additional file S4.pdf
- Additional file S5.pdf
