# Supplementary material for: Artificial Intelligence Implementation in Healthcare: A Theory-Based Scoping Review of Barriers and Facilitators
Source: Int J Environ Res Public Health. 2022 Dec 6;19(23):16359. doi: 10.3390/ijerph192316359 (PMC9738234; doi:10.3390/ijerph192316359)
Supplement: Supplementary file 1 [file ijerph-19-16359-s001.zip › Additional file S1.txt]

PUBMED: 

(«machine learning»[Title/Abstract] OR machine learning[mesh] OR «artificial intelligence»[Title/Abstract] OR artificial intelligence[mesh] OR «deep learning»[Title/Abstract] OR deep learning[mesh] OR «neural network»[Title/Abstract] OR «image analysis»[Title/Abstract] OR «deep neural networks»[Title/Abstract] OR «supervised learning»[Title/Abstract] OR «unsupervised learning»[Title/Abstract] OR «reinforcement learning»[Title/Abstract] OR «automated algorithms»[Title/Abstract] OR «adaptive algorithms» [Title/Abstract]) AND (implement* [Title] OR practice [Title] OR approved [Title]) AND (y_10[Filter]))

Web of Sciences: 

TS=(»machine learning» OR «artificial intelligence» OR «deep learning» OR «neural network» OR «image analysis» OR «deep neural networks» OR «supervised learning» OR «unsupervised learning» OR «reinforcement learning» OR «automated algorithms» OR «adaptive algorithms») AND TI=(implement* OR practice OR approved) AND TS= ("hospital" OR "health care" OR "healthcare")

Google scholar: 

“AI real-world implementation in healthcare” 

IEEE Xplore:

("Abstract":machine learning OR "Abstract":artificial intelligence OR "Abstract":deep learning OR "Abstract":neural network OR "Abstract":image analysis OR "Abstract":deep neural networks OR "Abstract":supervised learning OR "Abstract":unsupervised learning OR "Abstract":reinforcement learning OR "Abstract":automated algorithms OR "Abstract":adaptive algorithms) AND ("Abstract":implementation) AND ("Abstract":health OR "Abstract":hospital OR "Abstract":medicine)

ACM DL:

[[Abstract: machine learning] OR [Abstract: artificial intelligence] OR [Abstract: deep learning] OR [Abstract: neural network] OR [Abstract: image analysis] OR [Abstract: deep neural networks] OR [Abstract: supervised learning] OR [Abstract: unsupervised learning] OR [Abstract: reinforcement learning] OR [Abstract: automated algorithms] OR [Abstract: adaptive algorithms]] AND [Abstract: implementation] AND [[Abstract: health] OR [Abstract: hospital] OR [Abstract: medicine]]
