# Supplementary material for: Artificial Intelligence Implementation in Healthcare: A Theory-Based Scoping Review of Barriers and Facilitators
Source: Int J Environ Res Public Health. 2022 Dec 6;19(23):16359. doi: 10.3390/ijerph192316359 (PMC9738234; doi:10.3390/ijerph192316359)
Supplement: Supplementary file 1 [file ijerph-19-16359-s001.zip › Additional file S2.xlsx]

## Sheet: File S2-MMAT_agreement
Additional File S2. Critical appraisal.
Article	SCREENING QUESTIONS		QUALITATIVE STUDIES					QUANTITATIVE RANDOMIZED CONTROLLED TRIALS STUDIES					QUANTITATIVE NON-RANDOMIZED STUDIES					QUANTITATIVE DESCRIPTIVE STUDIES					MIXED METHODS STUDIES					OVERALL APPRAISAL	COMMENTS	CATEGORY
	Are there clear research questions?	Do the collected data allow to address the research questions?	Is the qualitative approach appropriate to answer the research question?	Are the qualitative data collection methods adequate to address the research question?	Are the findings adequately derived from the data?	Is the interpretation of results sufficiently substantiated by data?	Is there coherence between qualitative data sources, collection, analysis and interpretation?	Is randomization appropriately performed?	Are the groups comparable at baseline?	Are there complete outcome data?	Are outcome assessors blinded to the intervention provided?	Did the participants adhere to the assigned intervention?	Are the participants representative of the target population?	Are measurements appropriate regarding both the outcome and intervention (or exposure)?	Are there complete outcome data?	Are the confounders accounted for in the design and analysis?	During the study period, is the intervention administered (or exposure occurred) as intended?	Is the sampling strategy relevant to address the research question?	Is the sample representative of the target population?	Are the measurements appropriate?	Is the risk of nonresponse bias low?	Is the statistical analysis appropriate to answer the research question?	Is there an adequate rationale for using a mixed methods design to address the research question?	Are the different components of the study effectively integrated to answer the research question?	Are the outputs of the integration of qualitative and quantitative components adequately interpreted?	Are divergences and inconsistencies between quantitative and qualitative results adequately addressed?	Do the different components of the study adhere to the quality criteria of each tradition of the methods involved?	Include/Exclude/Seek further information			Luis
Lee2015	Yes	Yes											Yes	Yes	No	Can't tell	Yes											Include		Quantitative non-randomized	Quantitative non-randomized
Betriana2020	Yes	Yes	Yes	Yes	Yes	Yes	Yes																					Include		Qualitative	Qualitative
Cho2020	Yes	Yes											Yes	Yes	Yes	Yes	Yes											Include		Quantitative non-randomized	Quantitative non-randomized
Cruz2019	Yes	Yes											Yes	Yes	Yes	Can't tell	Yes											Include		Quantitative non-randomized	Quantitative non-randomized
Davis2020	Yes	Yes											Yes	Yes	Yes	Can't tell	Yes											Include		Quantitative non-randomized	Quantitative non-randomized
Gonçalves2020	Yes	Yes	Yes	Can't tell	Can't tell	Can't tell	Can't tell																					Include		Qualitative	Qualitative
Gonzalez-Briceno2020	Yes	Yes											Yes	Yes	Yes	Can't tell	Yes											Include		Quantitative non-randomized	Quantitative non-randomized
Guo2019	Yes	Yes																Can't tell	Can't tell	Yes	Can't tell	Yes						Include		Quantitative descriptive	Quantitative descriptive
Joerin2019	No	No	No	No	No	No	Can't tell																					Include		Qualitative	Qualitative
McCoy2017	Yes	Yes											Yes	Yes	Yes	Yes	Yes											Include		Quantitative non-randomized	Quantitative non-randomized
Moon2018	Yes	Yes											Yes	Yes	Yes	Yes	Yes											Include		Quantitative non-randomized	Quantitative non-randomized
Murphree2021	Yes	Yes											Yes	Yes	Yes	Yes	Yes											Include		Quantitative non-randomized	Quantitative non-randomized
Petitgand2020	Yes	Yes	Yes	Yes	Yes	Yes	Yes																					Include		Qualitative	Qualitative
Romero-Brufau2020	Yes	Yes											Yes	Yes	Yes	Yes	Yes											Include		Quantitative non-randomized	Quantitative non-randomized
Scheinker2020a	Yes	Can't tell	Yes	Can't tell	Can't tell	Can't tell	Can't tell																					Include		Qualitative	Qualitative
Schuh2018a	Yes	Yes	Yes	Can't tell	Yes	Yes	Yes																					Include		Qualitative	Qualitative
Sendak2020	Yes	Yes	Yes	Yes	Yes	Yes	Yes																					Include		Qualitative	Qualitative
VanderHeijden2018	Yes	Yes											Yes	Yes	Yes	Can't tell	Yes											Include		Quantitative non-randomized	Quantitative non-randomized
Xu2020	Yes	Yes											Yes	Yes	Yes	Yes	Yes											Include		Quantitative non-randomized	Quantitative non-randomized
ANSWER = yes/no/can't tell
